# Supplementary material for: Gold clusters prevent breast cancer bone metastasis by suppressing tumor-induced osteoclastogenesis
Source: PubMed Central journal article supplement (PMC7086366; doi:10.7150/thno.42218), 2020-03-04
Supplement: thnov10p4042s1.pdf [file thnov10p4042s1.pdf]

## Supplementary data

**Table S1.** The primer sequences used in the study

| Target Gene      | Primer sequences (5'-3')    |
|------------------|-----------------------------|
| $\beta$ -actin-F | GTACGCCAACACAGTGCTG         |
| $\beta$ -actin-R | CGTCATACTCCTGCTTGCTG        |
| Mouse TRAP-F     | GCTGGAAACCATGATCACCT        |
| Mouse TRAP-R     | GAGTTGCCACACAGCATCAC        |
| Mouse NFATc1-F   | TGGAGAAGCAGAGCACAGAC        |
| Mouse NFATc1-R   | GCGGAAAGGTGGTATCTCAA        |
| Mouse OSCAR-F    | CTGCTGGTAACGGATCAGCTCCCCAGA |
| Mouse OSCAR-R    | CCAAGGAGCCAGAACCTTCGAAACT   |
| Mouse C-FOS-F    | TTGCTGAGTCGCTTGACTGG        |
| Mouse C-FOS-R    | GGATTTGACTGGAGGTCTGC        |

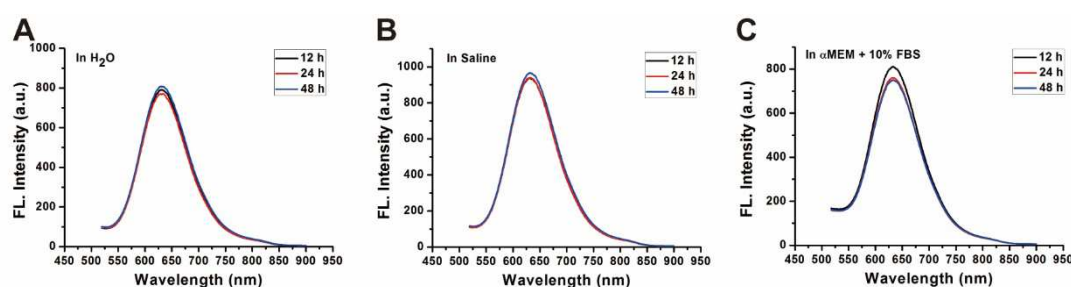

**Figure S1.** Fluorescence emission of BSA-Au clusters at different time points in different buffer solutions: ultrapure water (A), saline (B) and  $\alpha$ MED complete medium (C).

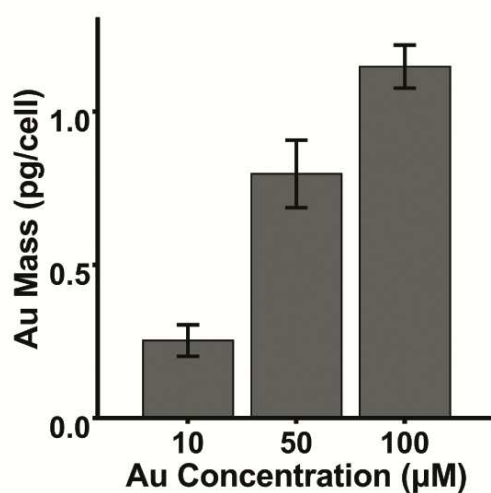

**Figure S2.** ICP-MS detection for intracellular Au content in MDA-MB-231 cells treated with different dose of BSA-Au clusters. The data is presented as mean  $\pm$  standard deviation of triplicate experiments.

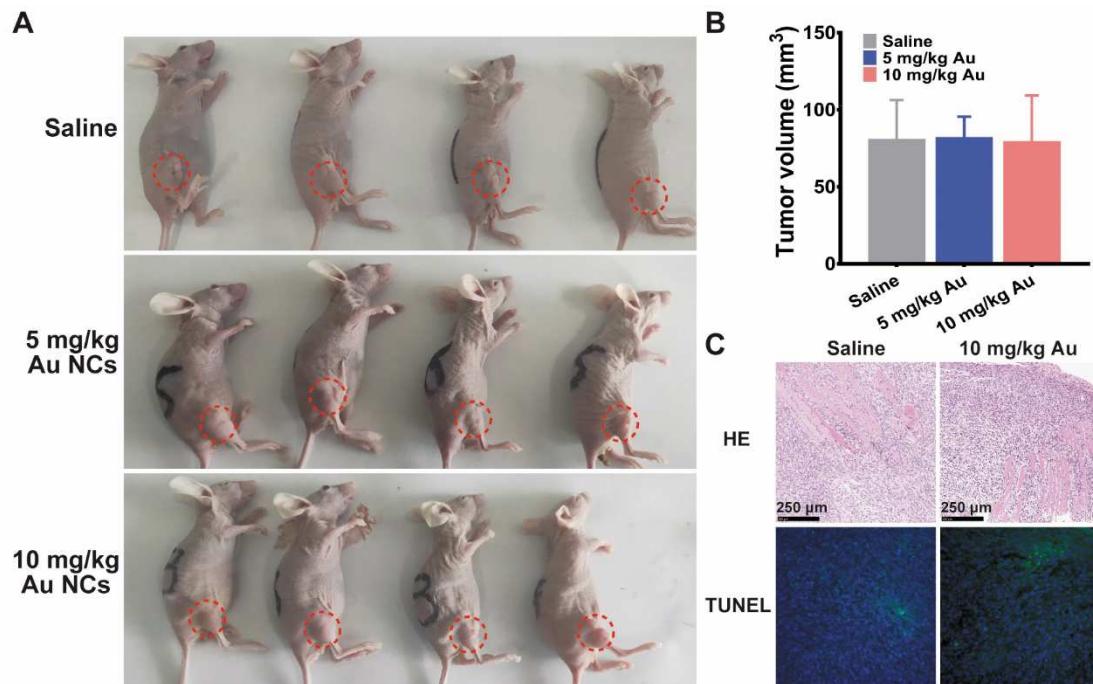

**Figure S3. Tumor growth in each group of BALB/c nude mice.** (A) Photographs of tumor-loading mice in each group after execution. Tumor site on the hindlimb is marked by red dotted circle. (B) Quantitative analyses of tumor volume. The data is presented as mean  $\pm$  standard deviation,  $n = 5$ . (C) HE and TUNEL staining of the tumor tissue of mice in the saline and 10 mg/kg BSA-Au clusters treated group.
